CORRECTION

# Correction: Who gets what, where: To what extent are inequalities in distribution of Norwegian child welfare service measures related to spatial and temporal variation

Norunn Hornset

[Fig 1](#) was uploaded incorrectly. Please see the correct [Fig 1](#) here.

## Reference

1. Hornset N. Who gets what, where: To what extent are inequalities in distribution of Norwegian child welfare service measures related to spatial and temporal variation. PLoS One. 2025;20(11):e0336104. <https://doi.org/10.1371/journal.pone.0336104> PMID: [41183056](https://pubmed.ncbi.nlm.nih.gov/41183056/)

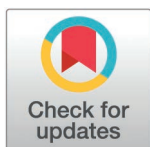

## OPEN ACCESS

**Citation:** Hornset N (2026) Correction: Who gets what, where: To what extent are inequalities in distribution of Norwegian child welfare service measures related to spatial and temporal variation. PLoS One 21(1): e0341689. <https://doi.org/10.1371/journal.pone.0341689>

**Published:** January 22, 2026

**Copyright:** © 2026 Norunn Hornset. This is an open access article distributed under the terms of the [Creative Commons Attribution License](https://creativecommons.org/licenses/by/4.0/), which permits unrestricted use, distribution, and reproduction in any medium, provided the original author and source are credited.

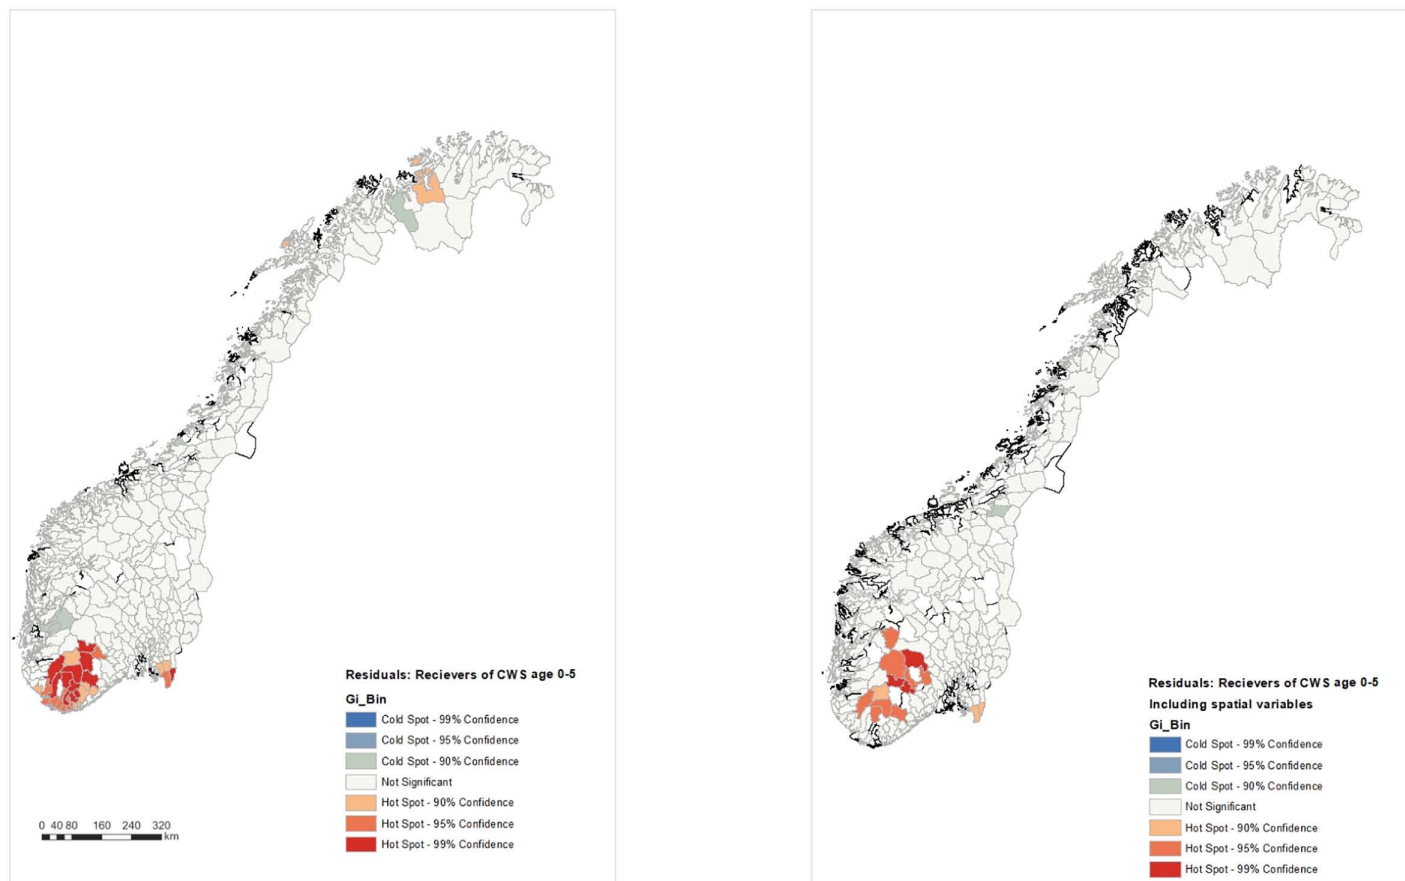

**Fig 1. Hotspots and coldspots in distribution of child welfare services for different age groups without and with spatial variables.**

<https://doi.org/10.1371/journal.pone.0341689.g001>
